# Supplementary material
Source: publisher site journal article supplement (https://www.dovepress.com/article/369715)
Supplement: Supplementary file 1 [file get_supplementary_file.php]

| **Table S1 Comparison of laboratory results in TB patients with and without psychiatric symptoms** | | | | | |
| --- | --- | --- | --- | --- | --- |
| **Blood counts and  biochemical tests** | **Patients**  **without psychiatric symptoms**  **(N=215)** | **Patients**  **with psychiatric symptoms**  **(N=22)** | **Total** | **Z** | ***P*** |
| WBC(10⁹/L) | 6.5(4.9-7.9) | 7.0 (6.0-8.74) | 6.5 (5.3-8.1) | -1.795 | 0.073 |
| Hgb(g) | 131.0(115.0-145.0) | 128.5(99.8-144.5) | 131.0(114.0-145.0) | -1.070 | 0.285 |
| PLT(10⁹/L) | 249.0(202.0-310.0) | 259.5(220.0-381.8) | 250.0(207.0-317.5) | -1.536 | 0.124 |
| ALT(U/L) | 11.0(8.0-17.0) | 8.5(8.0-15.5) | 11.0(8.0-16.5) | -0.988 | 0.323 |
| AST(U/L) | 18.0(15.0-24.0) | 18.0(14.0-24.0) | 18.0(15.0-24.0) | -0.523 | 0.601 |
| TBIL(μmol/L) | 9.3(7.1-11.9) | 9.3(7.5-10.4) | 9.3(7.3-11.9) | -0.036 | 0.971 |
| DBIL(μmol/L) | 2.4(1.9-2.9) | 2.4(1.9-3.0) | 2.4(1.9-2.9) | -0.128 | 0.899 |
| BUN(mmol/L) | 4.1(3.4-5.1) | 3.8(2.6-4.8) | 4.0(3.4-4.8) | -1.030 | 0.303 |
| CREA(umol/L) | 61.9(53.2-73.9) | 59.3(54.0-78.5) | 61.9(53.2-74.0) | -0.167 | 0.868 |
| Ca(umol/L) | 2.3(2.2-2.3) | 2.25(2.2-2.3) | 2.3(2.2-2.3) | -0.970 | 0.332 |
| K(umol/L) | 4.0(3.8-4.3) | 4.2(4.0-4.3) | 4.1(3.8-4.3) | -1.718 | 0.086 |
| Na(umol/L) | 139.6(137.8-141.6) | 138.6(137.6-140.8) | 139.6(137.8-141.4) | -0.870 | 0.384 |
| CL(umol/L) | 103.3(101.5-105.5) | 101.9(97.9-104.8) | 103.2(101.3-105.5) | -1.826 | 0.068 |
| Mg(umol/L) | 0.9(0.8-0.9) | 0.9(0.8-0.9) | 0.9(0.8-0.9) | -0.723 | 0.470 |
| T3(nmol/L) | 1.8(1.4-1.9) | 1.6(1.1-1.8) | 1.7(1.4-1.9) | -1.315 | 0.189 |
| T4(nmol/L) | 85.6(75.1-96.9) | 72.8(67.1-93.4) | 85.3(73.2-96.6) | -1.914 | 0.056 |
| TSH(mIU/L) | 2.2(1.4-3.8) | 1.9(1.4-3.6) | 2.2(1.4-3.8) | -0.219 | 0.827 |
| Median (Interquartile Range); WBC: Leukocyte; Hgb: Hemoglobin; PLT: Platelet; ALT: Alanine aminotransferase; AST: Aspartate aminotransferase; TBIL: Total bilirubin; DBIL: Direct Bilirubin; BUN: Blood Urea Nitrogen; CREA: Creatinine; Ca: Calcium; K: Potassium Kalium; CL: Chlorine; Mg: Magnesium; T3: Thyroxine (T3); T4: Thyroxine (T4); TSH: Thyroid stimulating hormone | | | | | |
